# Supplementary material for: High-performance quasi-solid-state asymmetric supercapacitors based on BiMn2O5 nanoparticles and redox-additive electrolytes
Source: Royal Society of Chemistry journal article supplement (doi:10.1039/c9qi00613c), 2019-01-01
Supplement: c9qi00613c1.pdf [file c9qi00613c1.pdf]

## High-performance quasi-solid-state asymmetric supercapacitor based on BiMn<sub>2</sub>O<sub>5</sub> nanoparticles and redox-additive electrolyte

Jai Bhagwan, Bhimanaboina Ramulu and Jae Su Yu<sup>†,\*</sup>

*Department of Electronic Engineering, Institute for Wearable Convergence Electronics, Kyung Hee University, 1 Seocheon-dong, Giheung-gu, Yongin-si, Gyeonggi-do 446-701, Republic of Korea*

The all solid-state supercapacitor devices were fabricated to check the practical application of the prepared electrode material. The charge balance of the quasi-solid-state asymmetric supercapacitor is maintained using the relationship of  $q^+ = q^-$ , where  $q^+$  and  $q^-$  are the charges stored at the positive and negative electrodes, respectively. The charges stored by each electrode material depend on the specific capacitance ( $C_s$ ), potential window ( $\Delta V$ ) and the mass of the active material ( $m$ ), as given by equations:

$$q = C_s \times \Delta V \times m \quad (S1)$$

So, the balance between the charges on positive and negative electrodes can be represented by:

$$C_s^+ \times \Delta V^+ \times m^+ = C_s^- \times \Delta V^- \times m^- \quad (S2)$$

$$\frac{m^+}{m^-} = \frac{C_s^- \times \Delta V^-}{C_s^+ \times \Delta V^+}$$

(S3)

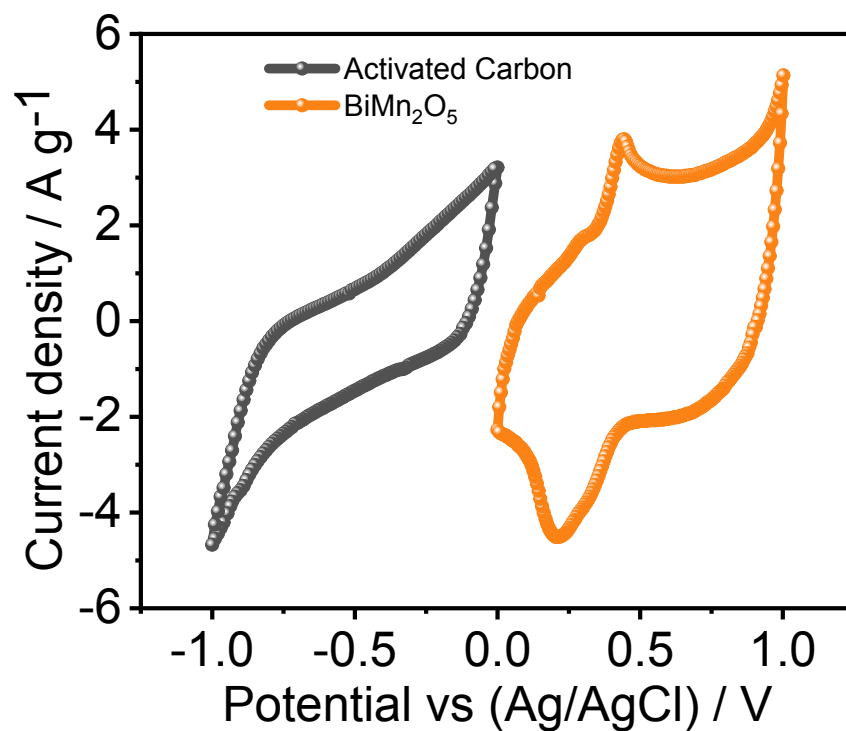

**Fig. S1** CV curves of activated carbon and BiMn<sub>2</sub>O<sub>5</sub> at 10 mV s<sup>-1</sup> in negative and positive directions, respectively.

For mass balancing process,  $C_s$  values were calculated from the CV curve at 10 mV s<sup>-1</sup> for positive and negative electrodes, and found to be 481 and 398 F g<sup>-1</sup>, respectively. Potential windows for positive and negative electrodes were selected to be 0.0 to 1.0 V and -1.0 to 0.0 V, respectively, as shown in **Fig. S1**. So, the  $\Delta V$  was equivalent to 2.0 V for the two electrode system. Hence, the mass ratio of positive to negative electrodes for device was decided to be 0.82.
